# Supplementary material
Source: MDPI journal article supplement (https://www.mdpi.com/1424-8247/14/8/770)
Supplement: s1 [file s1]

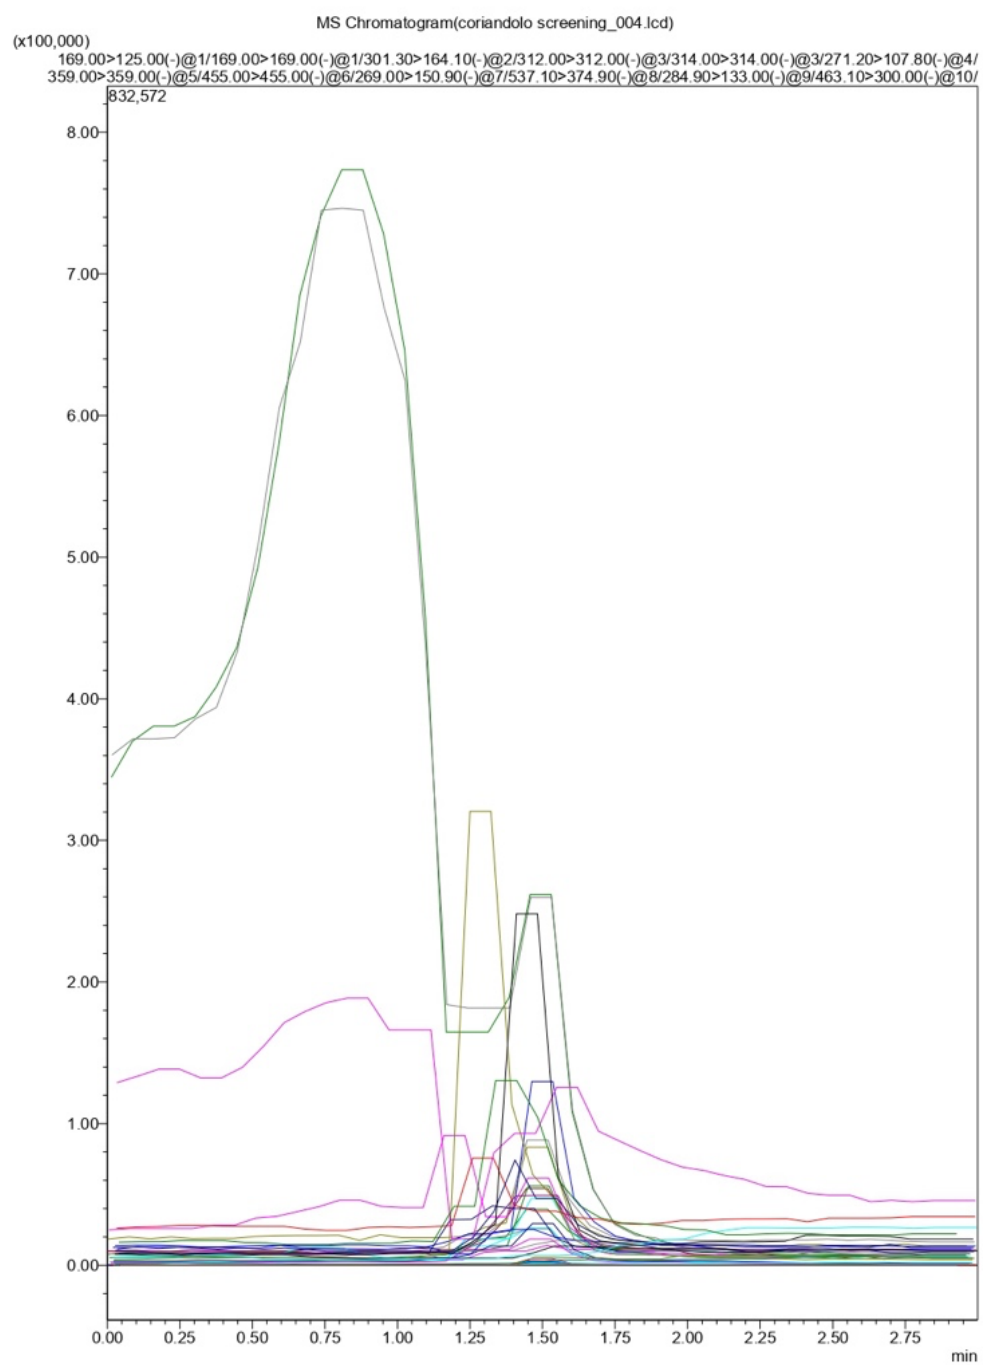

Figure S1: Molecular peaks of the CSP extract and their subsequent fragmentation in MS/MS experiment

Table S1: Identified fragments of the CSP extract

| Molecule                       | Identified fragments           | Coriandrium sativum seeds (PCS)                                                                                                                                                                                                                                                                                                                                                                                                                                                                                                                       | Standard in ACN (dil 1:1000)                                                                                                                                                                                                                                |     |      |   |               |    |                                                                                                                                                                                                                                                                                                                                                                                                                       |               |     |                                                                                                                                                                                                                                                                                                                                                                                                                                                                                  |               |               |                                                                                                                                                                                                                                                                                                                                                                                                                                                                                                                                                  |   |               |      |   |               |   |   |               |   |   |               |   |
|--------------------------------|--------------------------------|-------------------------------------------------------------------------------------------------------------------------------------------------------------------------------------------------------------------------------------------------------------------------------------------------------------------------------------------------------------------------------------------------------------------------------------------------------------------------------------------------------------------------------------------------------|-------------------------------------------------------------------------------------------------------------------------------------------------------------------------------------------------------------------------------------------------------------|-----|------|---|---------------|----|-----------------------------------------------------------------------------------------------------------------------------------------------------------------------------------------------------------------------------------------------------------------------------------------------------------------------------------------------------------------------------------------------------------------------|---------------|-----|----------------------------------------------------------------------------------------------------------------------------------------------------------------------------------------------------------------------------------------------------------------------------------------------------------------------------------------------------------------------------------------------------------------------------------------------------------------------------------|---------------|---------------|--------------------------------------------------------------------------------------------------------------------------------------------------------------------------------------------------------------------------------------------------------------------------------------------------------------------------------------------------------------------------------------------------------------------------------------------------------------------------------------------------------------------------------------------------|---|---------------|------|---|---------------|---|---|---------------|---|---|---------------|---|
| Vanillic acid                  | 167.00>123.00<br>167.00>167.00 | 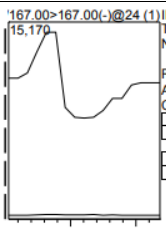 <p>167.00&gt;167.00(-)@24 (1) ID# 24 m/z: 167.00&gt;123.00<br/>Type: Target<br/>Name: vanillic acid<br/>Ret. Time: 0.000<br/>Area: 0<br/>Conc.: N.D. (Peak)</p> <table><thead><tr><th>#</th><th>m/z</th><th>Area</th></tr></thead><tbody><tr><td>1</td><td>167.00&gt;167.00</td><td>0</td></tr></tbody></table> <p>15.170</p>                                                                                                                                       | #                                                                                                                                                                                                                                                           | m/z | Area | 1 | 167.00>167.00 | 0  |  <p>167.00&gt;167.00(-)@24 (1) ID# 24 m/z: 167.00&gt;123.00<br/>Type: Target<br/>Name: vanillic acid<br/>Ret. Time: 0.000<br/>Area: 0<br/>Conc.: N.D. (Peak)</p> <table><thead><tr><th>#</th><th>m/z</th><th>Area</th></tr></thead><tbody><tr><td>1</td><td>167.00&gt;167.00</td><td>0</td></tr></tbody></table> <p>18.585</p>     | #             | m/z | Area                                                                                                                                                                                                                                                                                                                                                                                                                                                                             | 1             | 167.00>167.00 | 0                                                                                                                                                                                                                                                                                                                                                                                                                                                                                                                                                |   |               |      |   |               |   |   |               |   |   |               |   |
| #                              | m/z                            | Area                                                                                                                                                                                                                                                                                                                                                                                                                                                                                                                                                  |                                                                                                                                                                                                                                                             |     |      |   |               |    |                                                                                                                                                                                                                                                                                                                                                                                                                       |               |     |                                                                                                                                                                                                                                                                                                                                                                                                                                                                                  |               |               |                                                                                                                                                                                                                                                                                                                                                                                                                                                                                                                                                  |   |               |      |   |               |   |   |               |   |   |               |   |
| 1                              | 167.00>167.00                  | 0                                                                                                                                                                                                                                                                                                                                                                                                                                                                                                                                                     |                                                                                                                                                                                                                                                             |     |      |   |               |    |                                                                                                                                                                                                                                                                                                                                                                                                                       |               |     |                                                                                                                                                                                                                                                                                                                                                                                                                                                                                  |               |               |                                                                                                                                                                                                                                                                                                                                                                                                                                                                                                                                                  |   |               |      |   |               |   |   |               |   |   |               |   |
| #                              | m/z                            | Area                                                                                                                                                                                                                                                                                                                                                                                                                                                                                                                                                  |                                                                                                                                                                                                                                                             |     |      |   |               |    |                                                                                                                                                                                                                                                                                                                                                                                                                       |               |     |                                                                                                                                                                                                                                                                                                                                                                                                                                                                                  |               |               |                                                                                                                                                                                                                                                                                                                                                                                                                                                                                                                                                  |   |               |      |   |               |   |   |               |   |   |               |   |
| 1                              | 167.00>167.00                  | 0                                                                                                                                                                                                                                                                                                                                                                                                                                                                                                                                                     |                                                                                                                                                                                                                                                             |     |      |   |               |    |                                                                                                                                                                                                                                                                                                                                                                                                                       |               |     |                                                                                                                                                                                                                                                                                                                                                                                                                                                                                  |               |               |                                                                                                                                                                                                                                                                                                                                                                                                                                                                                                                                                  |   |               |      |   |               |   |   |               |   |   |               |   |
| Chlorogenic acid               | 353.00>190.00<br>353.00>353.00 |  <p>353.00&gt;353.00(-)@33 (1) ID# 33 m/z: 353.00&gt;190.00<br/>Type: Target<br/>Name: chlorogenic acid<br/>Ret. Time: 0.000<br/>Area: 0<br/>Conc.: N.D. (Peak)</p> <table><thead><tr><th>#</th><th>m/z</th><th>Area</th></tr></thead><tbody><tr><td>1</td><td>353.00&gt;353.00</td><td>0</td></tr></tbody></table> <p>84.515</p>                                                                                                                                    | #                                                                                                                                                                                                                                                           | m/z | Area | 1 | 353.00>353.00 | 0  |  <p>353.00&gt;353.00(-)@33 (1) ID# 33 m/z: 353.00&gt;190.00<br/>Type: Target<br/>Name: chlorogenic acid<br/>Ret. Time: 0.000<br/>Area: 0<br/>Conc.: N.D. (Peak)</p> <table><thead><tr><th>#</th><th>m/z</th><th>Area</th></tr></thead><tbody><tr><td>1</td><td>353.00&gt;353.00</td><td>0</td></tr></tbody></table> <p>120.264</p> | #             | m/z | Area                                                                                                                                                                                                                                                                                                                                                                                                                                                                             | 1             | 353.00>353.00 | 0                                                                                                                                                                                                                                                                                                                                                                                                                                                                                                                                                |   |               |      |   |               |   |   |               |   |   |               |   |
| #                              | m/z                            | Area                                                                                                                                                                                                                                                                                                                                                                                                                                                                                                                                                  |                                                                                                                                                                                                                                                             |     |      |   |               |    |                                                                                                                                                                                                                                                                                                                                                                                                                       |               |     |                                                                                                                                                                                                                                                                                                                                                                                                                                                                                  |               |               |                                                                                                                                                                                                                                                                                                                                                                                                                                                                                                                                                  |   |               |      |   |               |   |   |               |   |   |               |   |
| 1                              | 353.00>353.00                  | 0                                                                                                                                                                                                                                                                                                                                                                                                                                                                                                                                                     |                                                                                                                                                                                                                                                             |     |      |   |               |    |                                                                                                                                                                                                                                                                                                                                                                                                                       |               |     |                                                                                                                                                                                                                                                                                                                                                                                                                                                                                  |               |               |                                                                                                                                                                                                                                                                                                                                                                                                                                                                                                                                                  |   |               |      |   |               |   |   |               |   |   |               |   |
| #                              | m/z                            | Area                                                                                                                                                                                                                                                                                                                                                                                                                                                                                                                                                  |                                                                                                                                                                                                                                                             |     |      |   |               |    |                                                                                                                                                                                                                                                                                                                                                                                                                       |               |     |                                                                                                                                                                                                                                                                                                                                                                                                                                                                                  |               |               |                                                                                                                                                                                                                                                                                                                                                                                                                                                                                                                                                  |   |               |      |   |               |   |   |               |   |   |               |   |
| 1                              | 353.00>353.00                  | 0                                                                                                                                                                                                                                                                                                                                                                                                                                                                                                                                                     |                                                                                                                                                                                                                                                             |     |      |   |               |    |                                                                                                                                                                                                                                                                                                                                                                                                                       |               |     |                                                                                                                                                                                                                                                                                                                                                                                                                                                                                  |               |               |                                                                                                                                                                                                                                                                                                                                                                                                                                                                                                                                                  |   |               |      |   |               |   |   |               |   |   |               |   |
| Oleuropein                     | 539.00>539.00                  |  <p>539.00&gt;539.00(-)@20 ID# 20 m/z: 539.00&gt;539.00<br/>Type: Target<br/>Name: OLEUROPEIN<br/>Ret. Time: 0.000<br/>Area: 0<br/>Conc.: N.D. (W/B)</p> <p>138.378</p>                                                                                                                                                                                                                                                                                              |  <p>539.00&gt;539.00(-)@20 ID# 20 m/z: 539.00&gt;539.00<br/>Type: Target<br/>Name: OLEUROPEIN<br/>Ret. Time: 0.000<br/>Area: 0<br/>Conc.: N.D. (Peak)</p> <p>268.505</p> |     |      |   |               |    |                                                                                                                                                                                                                                                                                                                                                                                                                       |               |     |                                                                                                                                                                                                                                                                                                                                                                                                                                                                                  |               |               |                                                                                                                                                                                                                                                                                                                                                                                                                                                                                                                                                  |   |               |      |   |               |   |   |               |   |   |               |   |
| Epicatechin gallate            | 441.00>289.00<br>441.00>441.00 |  <p>441.00&gt;441.00(-)@36 (1) ID# 36 m/z: 441.00&gt;289.00<br/>Type: Target<br/>Name: epicatechin gallate<br/>Ret. Time: 0.000<br/>Area: 0<br/>Conc.: N.D. (Peak)</p> <table><thead><tr><th>#</th><th>m/z</th><th>Area</th></tr></thead><tbody><tr><td>1</td><td>441.00&gt;169.00</td><td>0</td></tr><tr><td>2</td><td>441.00&gt;441.00</td><td>0</td></tr></tbody></table> <p>80.294</p>                                                                         | #                                                                                                                                                                                                                                                           | m/z | Area | 1 | 441.00>169.00 | 0  | 2                                                                                                                                                                                                                                                                                                                                                                                                                     | 441.00>441.00 | 0   |  <p>441.00&gt;441.00(-)@36 (1) ID# 36 m/z: 441.00&gt;289.00<br/>Type: Target<br/>Name: epicatechin gallate<br/>Ret. Time: 0.000<br/>Area: 0<br/>Conc.: N.D. (Peak)</p> <table><thead><tr><th>#</th><th>m/z</th><th>Area</th></tr></thead><tbody><tr><td>1</td><td>441.00&gt;169.00</td><td>0</td></tr><tr><td>2</td><td>441.00&gt;441.00</td><td>0</td></tr></tbody></table> <p>120.404</p> | #             | m/z           | Area                                                                                                                                                                                                                                                                                                                                                                                                                                                                                                                                             | 1 | 441.00>169.00 | 0    | 2 | 441.00>441.00 | 0 |   |               |   |   |               |   |
| #                              | m/z                            | Area                                                                                                                                                                                                                                                                                                                                                                                                                                                                                                                                                  |                                                                                                                                                                                                                                                             |     |      |   |               |    |                                                                                                                                                                                                                                                                                                                                                                                                                       |               |     |                                                                                                                                                                                                                                                                                                                                                                                                                                                                                  |               |               |                                                                                                                                                                                                                                                                                                                                                                                                                                                                                                                                                  |   |               |      |   |               |   |   |               |   |   |               |   |
| 1                              | 441.00>169.00                  | 0                                                                                                                                                                                                                                                                                                                                                                                                                                                                                                                                                     |                                                                                                                                                                                                                                                             |     |      |   |               |    |                                                                                                                                                                                                                                                                                                                                                                                                                       |               |     |                                                                                                                                                                                                                                                                                                                                                                                                                                                                                  |               |               |                                                                                                                                                                                                                                                                                                                                                                                                                                                                                                                                                  |   |               |      |   |               |   |   |               |   |   |               |   |
| 2                              | 441.00>441.00                  | 0                                                                                                                                                                                                                                                                                                                                                                                                                                                                                                                                                     |                                                                                                                                                                                                                                                             |     |      |   |               |    |                                                                                                                                                                                                                                                                                                                                                                                                                       |               |     |                                                                                                                                                                                                                                                                                                                                                                                                                                                                                  |               |               |                                                                                                                                                                                                                                                                                                                                                                                                                                                                                                                                                  |   |               |      |   |               |   |   |               |   |   |               |   |
| #                              | m/z                            | Area                                                                                                                                                                                                                                                                                                                                                                                                                                                                                                                                                  |                                                                                                                                                                                                                                                             |     |      |   |               |    |                                                                                                                                                                                                                                                                                                                                                                                                                       |               |     |                                                                                                                                                                                                                                                                                                                                                                                                                                                                                  |               |               |                                                                                                                                                                                                                                                                                                                                                                                                                                                                                                                                                  |   |               |      |   |               |   |   |               |   |   |               |   |
| 1                              | 441.00>169.00                  | 0                                                                                                                                                                                                                                                                                                                                                                                                                                                                                                                                                     |                                                                                                                                                                                                                                                             |     |      |   |               |    |                                                                                                                                                                                                                                                                                                                                                                                                                       |               |     |                                                                                                                                                                                                                                                                                                                                                                                                                                                                                  |               |               |                                                                                                                                                                                                                                                                                                                                                                                                                                                                                                                                                  |   |               |      |   |               |   |   |               |   |   |               |   |
| 2                              | 441.00>441.00                  | 0                                                                                                                                                                                                                                                                                                                                                                                                                                                                                                                                                     |                                                                                                                                                                                                                                                             |     |      |   |               |    |                                                                                                                                                                                                                                                                                                                                                                                                                       |               |     |                                                                                                                                                                                                                                                                                                                                                                                                                                                                                  |               |               |                                                                                                                                                                                                                                                                                                                                                                                                                                                                                                                                                  |   |               |      |   |               |   |   |               |   |   |               |   |
| Catechin\ Epicatechin          | 289.00>245.00<br>289.00>289.00 |  <p>289.00&gt;289.00(-)@34 (1) ID# 34 m/z: 289.00&gt;245.00<br/>Type: Target<br/>Name: catechin/epicatechin<br/>Ret. Time: 0.000<br/>Area: 0<br/>Conc.: N.D. (Peak)</p> <table><thead><tr><th>#</th><th>m/z</th><th>Area</th></tr></thead><tbody><tr><td>1</td><td>289.00&gt;205.00</td><td>0</td></tr><tr><td>2</td><td>289.00&gt;179.00</td><td>0</td></tr><tr><td>3</td><td>289.00&gt;289.00</td><td>0</td></tr></tbody></table> <p>52.662</p>                  | #                                                                                                                                                                                                                                                           | m/z | Area | 1 | 289.00>205.00 | 0  | 2                                                                                                                                                                                                                                                                                                                                                                                                                     | 289.00>179.00 | 0   | 3                                                                                                                                                                                                                                                                                                                                                                                                                                                                                | 289.00>289.00 | 0             |  <p>289.00&gt;289.00(-)@34 (1) ID# 34 m/z: 289.00&gt;245.00<br/>Type: Target<br/>Name: catechin/epicatechin<br/>Ret. Time: 0.000<br/>Area: 0<br/>Conc.: N.D. (Peak)</p> <table><thead><tr><th>#</th><th>m/z</th><th>Area</th></tr></thead><tbody><tr><td>1</td><td>289.00&gt;205.00</td><td>0</td></tr><tr><td>2</td><td>289.00&gt;179.00</td><td>0</td></tr><tr><td>3</td><td>289.00&gt;289.00</td><td>0</td></tr></tbody></table> <p>55.342</p>           | # | m/z           | Area | 1 | 289.00>205.00 | 0 | 2 | 289.00>179.00 | 0 | 3 | 289.00>289.00 | 0 |
| #                              | m/z                            | Area                                                                                                                                                                                                                                                                                                                                                                                                                                                                                                                                                  |                                                                                                                                                                                                                                                             |     |      |   |               |    |                                                                                                                                                                                                                                                                                                                                                                                                                       |               |     |                                                                                                                                                                                                                                                                                                                                                                                                                                                                                  |               |               |                                                                                                                                                                                                                                                                                                                                                                                                                                                                                                                                                  |   |               |      |   |               |   |   |               |   |   |               |   |
| 1                              | 289.00>205.00                  | 0                                                                                                                                                                                                                                                                                                                                                                                                                                                                                                                                                     |                                                                                                                                                                                                                                                             |     |      |   |               |    |                                                                                                                                                                                                                                                                                                                                                                                                                       |               |     |                                                                                                                                                                                                                                                                                                                                                                                                                                                                                  |               |               |                                                                                                                                                                                                                                                                                                                                                                                                                                                                                                                                                  |   |               |      |   |               |   |   |               |   |   |               |   |
| 2                              | 289.00>179.00                  | 0                                                                                                                                                                                                                                                                                                                                                                                                                                                                                                                                                     |                                                                                                                                                                                                                                                             |     |      |   |               |    |                                                                                                                                                                                                                                                                                                                                                                                                                       |               |     |                                                                                                                                                                                                                                                                                                                                                                                                                                                                                  |               |               |                                                                                                                                                                                                                                                                                                                                                                                                                                                                                                                                                  |   |               |      |   |               |   |   |               |   |   |               |   |
| 3                              | 289.00>289.00                  | 0                                                                                                                                                                                                                                                                                                                                                                                                                                                                                                                                                     |                                                                                                                                                                                                                                                             |     |      |   |               |    |                                                                                                                                                                                                                                                                                                                                                                                                                       |               |     |                                                                                                                                                                                                                                                                                                                                                                                                                                                                                  |               |               |                                                                                                                                                                                                                                                                                                                                                                                                                                                                                                                                                  |   |               |      |   |               |   |   |               |   |   |               |   |
| #                              | m/z                            | Area                                                                                                                                                                                                                                                                                                                                                                                                                                                                                                                                                  |                                                                                                                                                                                                                                                             |     |      |   |               |    |                                                                                                                                                                                                                                                                                                                                                                                                                       |               |     |                                                                                                                                                                                                                                                                                                                                                                                                                                                                                  |               |               |                                                                                                                                                                                                                                                                                                                                                                                                                                                                                                                                                  |   |               |      |   |               |   |   |               |   |   |               |   |
| 1                              | 289.00>205.00                  | 0                                                                                                                                                                                                                                                                                                                                                                                                                                                                                                                                                     |                                                                                                                                                                                                                                                             |     |      |   |               |    |                                                                                                                                                                                                                                                                                                                                                                                                                       |               |     |                                                                                                                                                                                                                                                                                                                                                                                                                                                                                  |               |               |                                                                                                                                                                                                                                                                                                                                                                                                                                                                                                                                                  |   |               |      |   |               |   |   |               |   |   |               |   |
| 2                              | 289.00>179.00                  | 0                                                                                                                                                                                                                                                                                                                                                                                                                                                                                                                                                     |                                                                                                                                                                                                                                                             |     |      |   |               |    |                                                                                                                                                                                                                                                                                                                                                                                                                       |               |     |                                                                                                                                                                                                                                                                                                                                                                                                                                                                                  |               |               |                                                                                                                                                                                                                                                                                                                                                                                                                                                                                                                                                  |   |               |      |   |               |   |   |               |   |   |               |   |
| 3                              | 289.00>289.00                  | 0                                                                                                                                                                                                                                                                                                                                                                                                                                                                                                                                                     |                                                                                                                                                                                                                                                             |     |      |   |               |    |                                                                                                                                                                                                                                                                                                                                                                                                                       |               |     |                                                                                                                                                                                                                                                                                                                                                                                                                                                                                  |               |               |                                                                                                                                                                                                                                                                                                                                                                                                                                                                                                                                                  |   |               |      |   |               |   |   |               |   |   |               |   |
| Galocatechin\ Epigallocatechin | 457.00>169.00<br>457.00>457.00 |  <p>457.00&gt;457.00(-)@35 (1) ID# 35 m/z: 457.00&gt;169.00<br/>Type: Target<br/>Name: galocatechin/epigallocatechin<br/>Ret. Time: 0.000<br/>Area: 0<br/>Conc.: N.D. (W/B)</p> <table><thead><tr><th>#</th><th>m/z</th><th>Area</th></tr></thead><tbody><tr><td>1</td><td>457.00&gt;331.00</td><td>22</td></tr><tr><td>2</td><td>457.00&gt;305.00</td><td>248</td></tr><tr><td>3</td><td>457.00&gt;457.00</td><td>102680</td></tr></tbody></table> <p>171.611</p> | #                                                                                                                                                                                                                                                           | m/z | Area | 1 | 457.00>331.00 | 22 | 2                                                                                                                                                                                                                                                                                                                                                                                                                     | 457.00>305.00 | 248 | 3                                                                                                                                                                                                                                                                                                                                                                                                                                                                                | 457.00>457.00 | 102680        |  <p>457.00&gt;457.00(-)@35 (1) ID# 35 m/z: 457.00&gt;169.00<br/>Type: Target<br/>Name: galocatechin/epigallocatechin<br/>Ret. Time: 0.000<br/>Area: 0<br/>Conc.: N.D. (Peak)</p> <table><thead><tr><th>#</th><th>m/z</th><th>Area</th></tr></thead><tbody><tr><td>1</td><td>457.00&gt;331.00</td><td>0</td></tr><tr><td>2</td><td>457.00&gt;305.00</td><td>0</td></tr><tr><td>3</td><td>457.00&gt;457.00</td><td>0</td></tr></tbody></table> <p>386.675</p> | # | m/z           | Area | 1 | 457.00>331.00 | 0 | 2 | 457.00>305.00 | 0 | 3 | 457.00>457.00 | 0 |
| #                              | m/z                            | Area                                                                                                                                                                                                                                                                                                                                                                                                                                                                                                                                                  |                                                                                                                                                                                                                                                             |     |      |   |               |    |                                                                                                                                                                                                                                                                                                                                                                                                                       |               |     |                                                                                                                                                                                                                                                                                                                                                                                                                                                                                  |               |               |                                                                                                                                                                                                                                                                                                                                                                                                                                                                                                                                                  |   |               |      |   |               |   |   |               |   |   |               |   |
| 1                              | 457.00>331.00                  | 22                                                                                                                                                                                                                                                                                                                                                                                                                                                                                                                                                    |                                                                                                                                                                                                                                                             |     |      |   |               |    |                                                                                                                                                                                                                                                                                                                                                                                                                       |               |     |                                                                                                                                                                                                                                                                                                                                                                                                                                                                                  |               |               |                                                                                                                                                                                                                                                                                                                                                                                                                                                                                                                                                  |   |               |      |   |               |   |   |               |   |   |               |   |
| 2                              | 457.00>305.00                  | 248                                                                                                                                                                                                                                                                                                                                                                                                                                                                                                                                                   |                                                                                                                                                                                                                                                             |     |      |   |               |    |                                                                                                                                                                                                                                                                                                                                                                                                                       |               |     |                                                                                                                                                                                                                                                                                                                                                                                                                                                                                  |               |               |                                                                                                                                                                                                                                                                                                                                                                                                                                                                                                                                                  |   |               |      |   |               |   |   |               |   |   |               |   |
| 3                              | 457.00>457.00                  | 102680                                                                                                                                                                                                                                                                                                                                                                                                                                                                                                                                                |                                                                                                                                                                                                                                                             |     |      |   |               |    |                                                                                                                                                                                                                                                                                                                                                                                                                       |               |     |                                                                                                                                                                                                                                                                                                                                                                                                                                                                                  |               |               |                                                                                                                                                                                                                                                                                                                                                                                                                                                                                                                                                  |   |               |      |   |               |   |   |               |   |   |               |   |
| #                              | m/z                            | Area                                                                                                                                                                                                                                                                                                                                                                                                                                                                                                                                                  |                                                                                                                                                                                                                                                             |     |      |   |               |    |                                                                                                                                                                                                                                                                                                                                                                                                                       |               |     |                                                                                                                                                                                                                                                                                                                                                                                                                                                                                  |               |               |                                                                                                                                                                                                                                                                                                                                                                                                                                                                                                                                                  |   |               |      |   |               |   |   |               |   |   |               |   |
| 1                              | 457.00>331.00                  | 0                                                                                                                                                                                                                                                                                                                                                                                                                                                                                                                                                     |                                                                                                                                                                                                                                                             |     |      |   |               |    |                                                                                                                                                                                                                                                                                                                                                                                                                       |               |     |                                                                                                                                                                                                                                                                                                                                                                                                                                                                                  |               |               |                                                                                                                                                                                                                                                                                                                                                                                                                                                                                                                                                  |   |               |      |   |               |   |   |               |   |   |               |   |
| 2                              | 457.00>305.00                  | 0                                                                                                                                                                                                                                                                                                                                                                                                                                                                                                                                                     |                                                                                                                                                                                                                                                             |     |      |   |               |    |                                                                                                                                                                                                                                                                                                                                                                                                                       |               |     |                                                                                                                                                                                                                                                                                                                                                                                                                                                                                  |               |               |                                                                                                                                                                                                                                                                                                                                                                                                                                                                                                                                                  |   |               |      |   |               |   |   |               |   |   |               |   |
| 3                              | 457.00>457.00                  | 0                                                                                                                                                                                                                                                                                                                                                                                                                                                                                                                                                     |                                                                                                                                                                                                                                                             |     |      |   |               |    |                                                                                                                                                                                                                                                                                                                                                                                                                       |               |     |                                                                                                                                                                                                                                                                                                                                                                                                                                                                                  |               |               |                                                                                                                                                                                                                                                                                                                                                                                                                                                                                                                                                  |   |               |      |   |               |   |   |               |   |   |               |   |
| Rutin                          | 609.00>301.00<br>609.00>609.00 |  <p>609.00&gt;609.00(-)@42 (1) ID# 42 m/z: 609.00&gt;301.00<br/>Type: Target<br/>Name: Rutin<br/>Ret. Time: 0.000<br/>Area: 0<br/>Conc.: N.D. (Peak)</p> <table><thead><tr><th>#</th><th>m/z</th><th>Area</th></tr></thead><tbody><tr><td>1</td><td>609.00&gt;179.00</td><td>0</td></tr><tr><td>2</td><td>609.00&gt;151.00</td><td>0</td></tr><tr><td>3</td><td>609.00&gt;609.00</td><td>0</td></tr></tbody></table> <p>206.764</p>                                | #                                                                                                                                                                                                                                                           | m/z | Area | 1 | 609.00>179.00 | 0  | 2                                                                                                                                                                                                                                                                                                                                                                                                                     | 609.00>151.00 | 0   | 3                                                                                                                                                                                                                                                                                                                                                                                                                                                                                | 609.00>609.00 | 0             |  <p>609.00&gt;609.00(-)@42 (1) ID# 42 m/z: 609.00&gt;301.00<br/>Type: Target<br/>Name: Rutin<br/>Ret. Time: 0.000<br/>Area: 0<br/>Conc.: N.D. (Peak)</p> <table><thead><tr><th>#</th><th>m/z</th><th>Area</th></tr></thead><tbody><tr><td>1</td><td>609.00&gt;179.00</td><td>0</td></tr><tr><td>2</td><td>609.00&gt;151.00</td><td>0</td></tr><tr><td>3</td><td>609.00&gt;609.00</td><td>0</td></tr></tbody></table> <p>778.244</p>                         | # | m/z           | Area | 1 | 609.00>179.00 | 0 | 2 | 609.00>151.00 | 0 | 3 | 609.00>609.00 | 0 |
| #                              | m/z                            | Area                                                                                                                                                                                                                                                                                                                                                                                                                                                                                                                                                  |                                                                                                                                                                                                                                                             |     |      |   |               |    |                                                                                                                                                                                                                                                                                                                                                                                                                       |               |     |                                                                                                                                                                                                                                                                                                                                                                                                                                                                                  |               |               |                                                                                                                                                                                                                                                                                                                                                                                                                                                                                                                                                  |   |               |      |   |               |   |   |               |   |   |               |   |
| 1                              | 609.00>179.00                  | 0                                                                                                                                                                                                                                                                                                                                                                                                                                                                                                                                                     |                                                                                                                                                                                                                                                             |     |      |   |               |    |                                                                                                                                                                                                                                                                                                                                                                                                                       |               |     |                                                                                                                                                                                                                                                                                                                                                                                                                                                                                  |               |               |                                                                                                                                                                                                                                                                                                                                                                                                                                                                                                                                                  |   |               |      |   |               |   |   |               |   |   |               |   |
| 2                              | 609.00>151.00                  | 0                                                                                                                                                                                                                                                                                                                                                                                                                                                                                                                                                     |                                                                                                                                                                                                                                                             |     |      |   |               |    |                                                                                                                                                                                                                                                                                                                                                                                                                       |               |     |                                                                                                                                                                                                                                                                                                                                                                                                                                                                                  |               |               |                                                                                                                                                                                                                                                                                                                                                                                                                                                                                                                                                  |   |               |      |   |               |   |   |               |   |   |               |   |
| 3                              | 609.00>609.00                  | 0                                                                                                                                                                                                                                                                                                                                                                                                                                                                                                                                                     |                                                                                                                                                                                                                                                             |     |      |   |               |    |                                                                                                                                                                                                                                                                                                                                                                                                                       |               |     |                                                                                                                                                                                                                                                                                                                                                                                                                                                                                  |               |               |                                                                                                                                                                                                                                                                                                                                                                                                                                                                                                                                                  |   |               |      |   |               |   |   |               |   |   |               |   |
| #                              | m/z                            | Area                                                                                                                                                                                                                                                                                                                                                                                                                                                                                                                                                  |                                                                                                                                                                                                                                                             |     |      |   |               |    |                                                                                                                                                                                                                                                                                                                                                                                                                       |               |     |                                                                                                                                                                                                                                                                                                                                                                                                                                                                                  |               |               |                                                                                                                                                                                                                                                                                                                                                                                                                                                                                                                                                  |   |               |      |   |               |   |   |               |   |   |               |   |
| 1                              | 609.00>179.00                  | 0                                                                                                                                                                                                                                                                                                                                                                                                                                                                                                                                                     |                                                                                                                                                                                                                                                             |     |      |   |               |    |                                                                                                                                                                                                                                                                                                                                                                                                                       |               |     |                                                                                                                                                                                                                                                                                                                                                                                                                                                                                  |               |               |                                                                                                                                                                                                                                                                                                                                                                                                                                                                                                                                                  |   |               |      |   |               |   |   |               |   |   |               |   |
| 2                              | 609.00>151.00                  | 0                                                                                                                                                                                                                                                                                                                                                                                                                                                                                                                                                     |                                                                                                                                                                                                                                                             |     |      |   |               |    |                                                                                                                                                                                                                                                                                                                                                                                                                       |               |     |                                                                                                                                                                                                                                                                                                                                                                                                                                                                                  |               |               |                                                                                                                                                                                                                                                                                                                                                                                                                                                                                                                                                  |   |               |      |   |               |   |   |               |   |   |               |   |
| 3                              | 609.00>609.00                  | 0                                                                                                                                                                                                                                                                                                                                                                                                                                                                                                                                                     |                                                                                                                                                                                                                                                             |     |      |   |               |    |                                                                                                                                                                                                                                                                                                                                                                                                                       |               |     |                                                                                                                                                                                                                                                                                                                                                                                                                                                                                  |               |               |                                                                                                                                                                                                                                                                                                                                                                                                                                                                                                                                                  |   |               |      |   |               |   |   |               |   |   |               |   |
